# Supplementary material for: Spectroscopic Photoacoustic Molecular Imaging of Breast Cancer using a B7-H3-targeted ICG Contrast Agent
Source: PubMed Central journal article supplement — Theranostics. 2017 Apr 3;7(6):1463–76. doi: 10.7150/thno.18217 (PMC5436506; doi:10.7150/thno.18217), 2017-04-03
Supplement: thnov07p1463s1.pdf [file thnov07p1463s1.pdf]

## Supplementary Materials

### Spectroscopic Photoacoustic Molecular Imaging of Breast Cancer

Katheryne E. Wilson PhD<sup>1</sup>, Sunitha V. Bachawal PhD<sup>1</sup>, Lotfi Abou-Elkacem PhD<sup>1</sup>, Kristen Jensen, MD<sup>2</sup>,  
Steven Machtaler PhD<sup>1</sup>, Lu Tian PhD<sup>3</sup>, Jürgen K. Willmann MD<sup>1</sup>

<sup>1</sup>Department of Radiology, Molecular Imaging Program at Stanford,

<sup>2</sup>Departments of Pathology

<sup>3</sup>Department of Health Research and Policy

Stanford University, School of Medicine, Stanford, California, USA

#### Supplemental Tables

**Supplemental Table 1. Human B7-H3 Immunohistochemical Staining Score Summary.** Individual and composite immunohistochemical (IHC) scores of B7-H3 staining of normal breast tissue, benign, precursor, and malignant breast lesions presented as the mean  $\pm$  standard deviation. \*P < 0.01.

| Histology                                  | Subtype         | n  | Composite IHC Score<br>Mean $\pm$ SD | Combined Grouping IHC Scores<br>Mean $\pm$ SD |
|--------------------------------------------|-----------------|----|--------------------------------------|-----------------------------------------------|
| <b>Normal Breast Tissue</b>                | --              | 53 | 0.96 $\pm$ 1.82                      | 1.40 $\pm$ 2.10                               |
|                                            | Adenosis        | 5  | 4.00 $\pm$ 4.00                      |                                               |
| <b>Benign and Precursor Breast Lesions</b> | ADH             | 2  | 0.00 $\pm$ 0.00                      |                                               |
|                                            | ALH             | 6  | 1.50 $\pm$ 1.975                     |                                               |
|                                            | ApoM            | 5  | 1.60 $\pm$ 3.58                      |                                               |
|                                            | CCL             | 75 | 1.267 $\pm$ 1.68                     |                                               |
|                                            | DCIS            | 13 | 2.77 $\pm$ 3.09                      |                                               |
|                                            | FA              | 1  | 4.00 $\pm$ 0.00                      |                                               |
|                                            | FEA             | 9  | 2.11 $\pm$ 1.83                      |                                               |
|                                            | NPFCC           | 2  | 2.00 $\pm$ 2.83                      |                                               |
|                                            | Radial scar     | 2  | 0.00 $\pm$ 0.00                      |                                               |
|                                            | UDH             | 9  | 2.68 $\pm$ 2.40                      |                                               |
| <b>Breast Cancer</b>                       | Luminal A       | 40 | 7.17 $\pm$ 3.78                      | 8.8 $\pm$ 3.69*                               |
|                                            | Luminal B       | 15 | 9.80 $\pm$ 3.43                      |                                               |
|                                            | Her2            | 20 | 9.55 $\pm$ 3.33                      |                                               |
|                                            | Triple negative | 22 | 10.55 $\pm$ 2.91                     |                                               |

**Supplemental Table 2.** Spectroscopic photoacoustic molecular B7-H3 signal and fluorescence ICG signal presented by individual experimental time points.

| <b>Spectroscopic Photoacoustic Imaging</b> |                                          |                                              |                                            |                                             |                                            |                                            |
|--------------------------------------------|------------------------------------------|----------------------------------------------|--------------------------------------------|---------------------------------------------|--------------------------------------------|--------------------------------------------|
| Test Condition                             | Mean (95% CI), Interquartile Range       |                                              |                                            |                                             |                                            |                                            |
|                                            | 0 hr                                     | 24 hr                                        | 48 hr                                      | 72 hr                                       | 96 hr                                      | Combined                                   |
| <b>B7-H3-ICG<br/>(n=80)</b>                | <b>1.0</b><br>(1.0, 1.0),<br>1.0 - 1.0   | <b>3.80*</b><br>(2.94, 4.66),<br>1.65 - 4.65 | <b>2.29*</b><br>(1.71, 2.87),<br>0.77-2.93 | <b>2.65*</b><br>(1.96, 3.34),<br>0.70-3.25  | <b>3.27*</b><br>(2.43, 4.12),<br>1.00-3.88 | <b>3.01*</b><br>(2.63, 3.38),<br>1.00-3.70 |
| <b>B7-H3-ICG (Norma)<br/>(n=60)</b>        | <b>1.0</b><br>(1.0, 1.0),<br>1.0 - 1.0   | <b>1.37*</b><br>(1.19, 1.54),<br>0.88-1.96   | <b>1.13</b><br>(0.89, 1.37),<br>0.61-1.54  | <b>1.07</b><br>(0.84, 1.30),<br>0.40 - 1.68 | <b>0.97</b><br>(0.80, 1.15),<br>0.50-1.40  | <b>1.13</b><br>(1.03, 1.23),<br>0.6-1.6    |
| <b>Blocking+B7-H3-ICG<br/>(n=20)</b>       | <b>1.0</b><br>(1.0, 1.0),<br>1.0 - 1.0   | <b>2.00*</b><br>(1.34, 2.66),<br>1.08-2.45   | <b>0.86</b><br>(0.55, 1.17),<br>0.36-1.36  | <b>0.92</b><br>(0.55, 1.29),<br>0.31-1.67   | <b>1.14</b><br>(0.55,1.74),<br>0.41-1.50   | <b>1.22</b><br>(0.97, 1.48),<br>0.40-1.79  |
| <b>Iso-ICG<br/>(n=30)</b>                  | <b>1.0</b><br>(1.0, 1.0),<br>1.0 - 1.0   | <b>1.2</b><br>(0.9, 1.5),<br>0.7-1.6         | <b>1.2</b><br>(0.8, 1.5),<br>0.5-1.8       | <b>1.4</b><br>(1.0-1.7),<br>0.7-2.0         | <b>1.2</b><br>(0.8, 1.6),<br>0.5-1.4       | <b>1.24</b><br>(1.08, 1.40),<br>0.5-1.75   |
| <b>Fluorescence</b>                        | <b>0 hr</b>                              | <b>0.5 hr</b>                                | <b>0.75 hr</b>                             | <b>1 hr</b>                                 | <b>2 hr</b>                                | <b>24 hr</b>                               |
| <b>Free ICG<br/>(n=20)</b>                 | <b>1.01</b><br>(0.97,1.04),<br>0.90-1.10 | <b>1.07*</b><br>(1.02,1.12),<br>1.00-1.10    | <b>1.10*</b><br>(1.05, 1.15),<br>1.10-1.20 | <b>1.09*</b><br>(1.05,1.14),<br>1.03-1.18   | <b>1.12*</b><br>(1.07,1.17),<br>1.10-1.20  | <b>1.03</b><br>(0.99, 1.06),<br>1.00-1.10  |

Statistical significance ( $P < 0.01$ ) compared to the 0 hr time point is denoted with asterisks (\*).

## Supplemental Figures

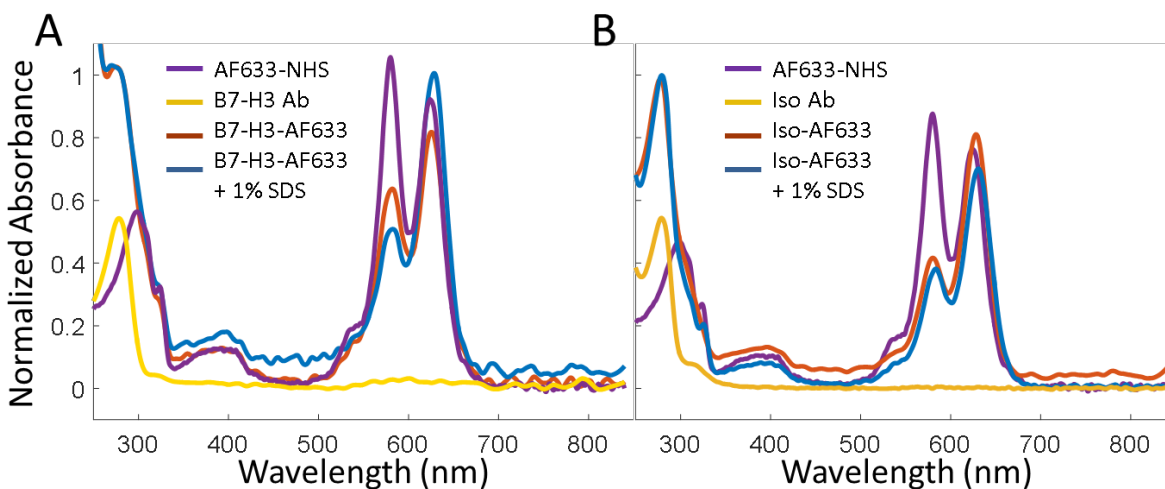

**Supplemental Figure 1. Absorbance Spectra of Antibody-AF633 Dye Conjugates.** **A.** Absorbance spectra of both the B7-H3 antibody and AF633-NHS before conjugation, the B7-H3-AF633 conjugate, and the B7-H3-AF633 conjugate in 1% SDS for unquenched absorption signal. Ab-dye conjugates are normalized at 280 nm. Dye is normalized to the antibody-dye conjugate at 400 nm. **B.** Absorbance spectra of the isotype control antibody and AF633-NHS before conjugation, the Iso-AF633 conjugate, and the Iso-AF633 conjugate in 1% SDS for unquenched absorption signal. Antibody-dye conjugates are normalized at 280 nm. Dye is normalized to the antibody-dye conjugate at 400 nm. The specific (B7-H3) and isotype control antibody conjugates show similar absorbance spectra.

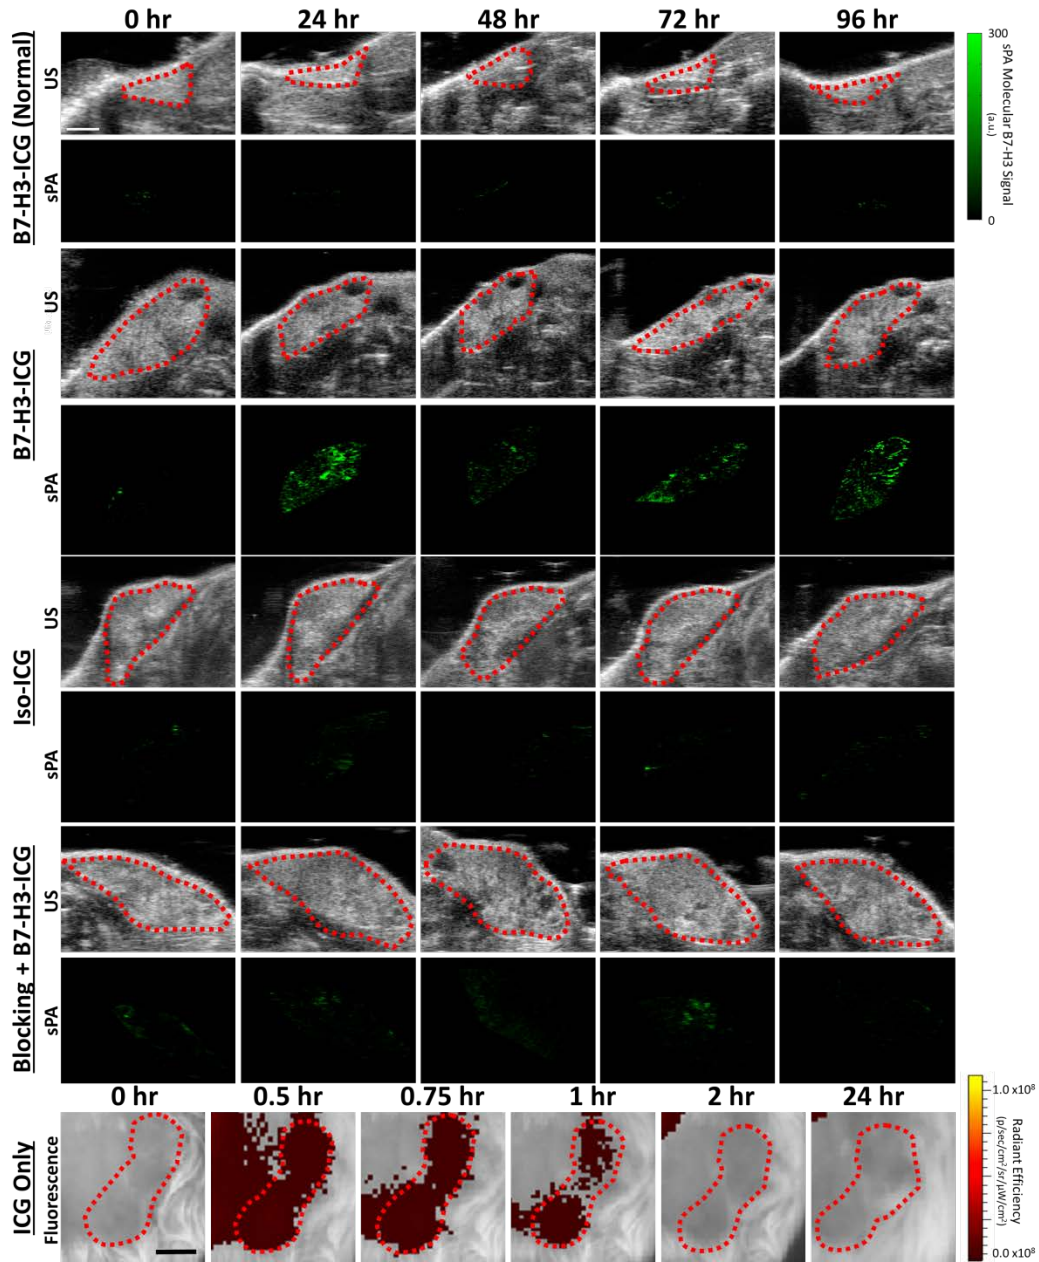

**Supplemental Figure 2. Spectroscopic Photoacoustic Molecular Imaging of B7-H3 in Normal Breast Tissue and in Breast Cancer.** B-mode ultrasound images were used to select the desired ROI (red dash lines) over the mammary glands to be used with the sPA imaging algorithm. Note strong B7-H3-targeted sPA molecular imaging signal in breast cancer compared to normal tissue. Iso-ICG, the blocked B7-H3-ICG condition, and free ICG show no tumor accumulation at. Scale bar in in ultrasound and sPA images represents 2 mm and in fluorescence image represents 1 mm. Note that free ICG was only imaged with fluorescence rapid clearance of ICG prohibiting sPA imaging.

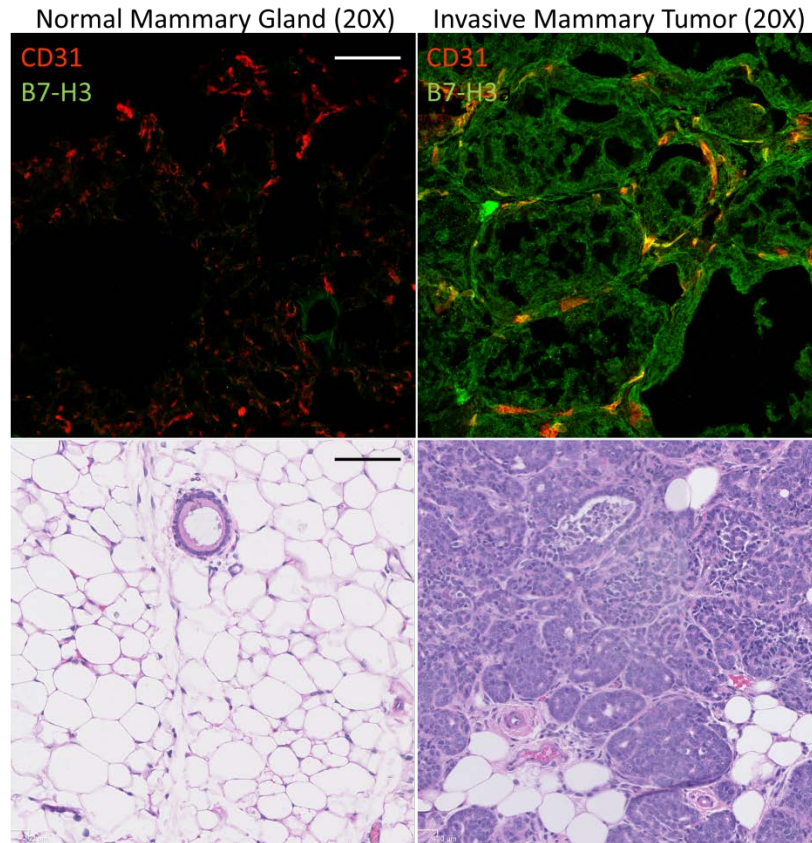

**Supplemental Figure 3. Immunohistochemistry and Histopathological Micrographs of Murine Mammary Tissues Stained for B7-H3 and CD31 Markers.** Normal murine mammary gland stained for B7-H3 (green), and CD31 (red), showed little to no staining for the B7-H3 marker. Breast cancer showed strong B7-H3 expression on both vascular endothelial cells (CD31, red; co-localization shown in yellow) and tumor epithelium and stroma. Scale bars represent 80  $\mu\text{m}$ .
